Gonzales et al.

"Transcriptome analysis in trisomy 21"

1

2

3

4

5 **Transcriptome analysis of genetically matched human induced pluripotent**

6 **stem cells disomic or trisomic for chromosome 21.**

7

8 Patrick Gonzales\*<sup>†</sup>, Gin Fonte\*<sup>†</sup>, Christine Roberts\*<sup>†</sup>, Connor Jacobsen<sup>†</sup>,

9 Gretchen H. Stein\*<sup>¶</sup>, Christopher D. Link\*<sup>†</sup>

10

11

12 \* Linda Crnic Institute for Down Syndrome, University of Colorado, Aurora, CO

13 80045

14

15 <sup>†</sup> Department of Integrative Physiology, University of Colorado, Boulder, CO

16 80309

17

18 <sup>¶</sup> Department of Molecular, Cellular, and Developmental Biology, University of

19 Colorado, Boulder, CO 80309

20

Gonzales et al.

"Transcriptome analysis in trisomy 21"

21 ***Transcriptome analysis in trisomy 21***

22

23 Key words:

24

25 RNA-seq, Down syndrome, cluster analysis, JunctionSeq, HERVH

26

27 Corresponding author:

28

29 Christopher D. Link, Ph.D.

30 Associate Professor

31 Linda Crnic Institute/Integrative Physiology

32 University of Colorado

33 Campus Box 354

34 Boulder, CO 80309

35

36 phone: 303 735-5112

37 email: [linkc@colorado.edu](mailto:linkc@colorado.edu)

38 **Abstract**

39

40 Trisomy of chromosome 21, the genetic cause of Down syndrome, has the  
41 potential to alter expression of genes on chromosome 21, as well as other  
42 locations throughout the genome. These transcriptome changes are likely to  
43 underlie the Down syndrome clinical phenotypes. We have employed RNA-seq  
44 to undertake an in-depth analysis of transcriptome changes resulting from  
45 trisomy of chromosome 21, using induced pluripotent stem cells (iPSCs) derived  
46 from a single individual with Down syndrome. These cells were originally derived  
47 by Li et al, who genetically targeted chromosome 21 in trisomic iPSCs, allowing  
48 selection of disomic sibling iPSC clones. Analyses were conducted on  
49 trisomic/disomic cell pairs maintained as iPSCs or differentiated into cortical  
50 neuronal cultures. In addition to characterization of gene expression levels, we  
51 have also investigated patterns of RNA adenosine-to-inosine editing, alternative  
52 splicing, and repetitive element expression, aspects of the transcriptome that  
53 have not been significantly characterized in the context of Down syndrome. We  
54 identified significant changes in transcript accumulation associated with  
55 chromosome 21 trisomy, as well as changes in alternative splicing and repetitive  
56 element transcripts. Unexpectedly, the trisomic iPSCs we characterized  
57 expressed higher levels of neuronal transcripts than control disomic iPSCs, and  
58 readily differentiated into cortical neurons, in contrast to another reported study.  
59 Comparison of our transcriptome data with similar studies of trisomic iPSCs  
60 suggests that trisomy of chromosome 21 may not intrinsically limit neuronal  
61 differentiation, but instead may interfere with the maintenance of pluripotency.

62

63

64 **Introduction**

65

66 Down Syndrome (DS) results from an extra copy of chromosome 21, and this  
67 change in gene dosage has been proposed to alter chromosome 21 gene  
68 expression. Chromosome 21 trisomy also has the potential to alter the global  
69 transcriptome, either by secondary effects of chromosome 21 gene over-  
70 expression, or as a byproduct of additional genetic material itself. In addition to  
71 the possible perturbation of specific cellular pathways by altered expression of  
72 chromosome 21 genes, chromosome 21 also contains genes that impact the  
73 global transcriptome directly. These include *ADARB1*, encoding one of two  
74 genes responsible for adenosine-to-inosine RNA editing; U2AF1, a constitutive  
75 splicing factor; and DYRK1A, a kinase known to target splicing factors.

76 Identifying transcriptome changes reproducibly caused by chromosome 21  
77 trisomy may be crucial to understanding the origins of the clinical features of  
78 Down Syndrome.

79

80 Initial gene expression studies that sought to establish chromosome 21-  
81 dependent transcriptome changes using human material were confounded by the  
82 effects of different genetic backgrounds in the DS and control individuals who  
83 were studied (Gardiner et al, 2010). An alternative approach is to characterize  
84 gene expression in inbred mouse DS models, which reproduce some of the  
85 developmental and behavioral phenotypes of DS individuals (Liu et al, 2011).

Gonzales et al.

"Transcriptome analysis in trisomy 21"

86 Transcriptome studies have been done in multiple mouse DS models (Saran et  
87 al, 2003; Potier et al, 2006; Ling et al, 2014; Guedj et al, 2015; Olmos-Serrano et  
88 al, 2016), but no consistent pattern of transcriptome changes has been identified,  
89 perhaps due to the different tissues and developmental stages analyzed in these  
90 studies. In addition, these mouse DS models have triplication of chromosomal  
91 regions syntenic to only part of human chromosome 21 as well as triplication of  
92 non-chromosome 21 homologous genes, and thus may not capture the full  
93 effects of human chromosome 21 trisomy.

94

95 Recently, the development of paired disomic/trisomic induced pluripotent stem  
96 cells (iPSCs) derived from the same trisomic individual (or from discordant  
97 monozygotic twins) has allowed the measurement of human trisomy 21-  
98 dependent gene expression independent of genetic background differences (Li et  
99 al, 2012; Weick et al, 2013; Jiang et al, 2013; LeTourneau et al, 2014). These  
100 studies have consistently observed a general upregulation of genes on  
101 chromosome 21, as well as highly variable significant gene expression  
102 differences on other chromosomes. Li et al (2012) used an elegant genetic  
103 selection system to derive disomic iPSC subclones from chr21 trisomic iPSCs  
104 that were derived from an individual with Down syndrome. Based on an initial  
105 microarray analysis, these researchers also reported a general upregulation of  
106 chromosome 21 genes, but could identify only 3 non-chromosome 21 genes with  
107 a > 2 fold dysregulation between disomic and trisomic iPSC pairs. We have used  
108 RNA-seq to significantly extend this analysis using both disomic/trisomic iPSC  
109 pairs and cortical neuron cultures derived from them. In addition to assaying

Gonzales et al.

"Transcriptome analysis in trisomy 21"

110 transcript accumulation, we have used the RNA-seq data to look for other  
111 possible trisomy-induced transcriptome changes, including possible alterations in  
112 adenosine-to-inosine RNA editing, alternative splicing, and repetitive element  
113 expression.

114

115 In contrast to the Jiang et al study, the trisomic iPSCs we characterized were not  
116 restricted in their ability differentiate into cortical neuron cultures, and in fact  
117 showed higher expression of neuronal transcripts when compared to disomic  
118 iPSCs. To investigate differences between our analyses and previous studies,  
119 we have compared global gene expression data among the related studies, and  
120 find evidence for at least two different states for trisomic iPSC. We suggest that  
121 these different states may reflect an inherent inability for trisomic iPSCs to  
122 maintain full pluripotency.

123

## 124 **Materials and Methods**

125

### 126 *iPSC Cell Culture*

127

128 Trisomic (C2 and C3) and disomic iPSC cell lines (C2-4-3, C2-4-4, C3-5-11,  
129 and C3-5-13), which had been developed from an individual with Down  
130 syndrome by Li et al. (2012), were obtained through the Linda Crnic Institute for  
131 Down Syndrome (University of Colorado, Aurora, CO). These iPSC lines were  
132 grown on Geltrex (Life Technologies) under feeder-free conditions in mTeSR1  
133 medium according to the protocol of Stem Cell Technologies. iPSC colonies

Gonzales et al.

"Transcriptome analysis in trisomy 21"

134 were passaged with dispase, and differentiating colonies were removed manually  
135 by scraping. Periodically, live iPSC colonies were stained with anti-Tra-1-60 or  
136 Tra-1-81 conjugated to Dylight fluor 488 to confirm the stem cell character of the  
137 colonies. Likewise, fixed cells were shown to express Oct4 by immunostaining.  
138 We used ABI/Thermo Fisher TaqMan Copy Number Assays (Hs01180853\_cn;  
139 Hs02928366\_cn; Hs01533676 corresponding to APP, DYRK1A and RCAN1  
140 respectively) to evaluate the number of copies of Chr. 21 in the iPSC lines. We  
141 found that C2 was stably trisomic, but that C3 appeared initially to be a mixture of  
142 trisomic and disomic cells that rapidly gave rise to a consistently disomic cell line,  
143 which we call C3-D21.

144

145 *Neuronal Differentiation*

146

147 iPSC cells were induced to differentiate to cortical neurons by a modification of  
148 the method of Espuny-Camacho et al. (2013). Briefly, iPSCs were dissociated  
149 with Accutase, and plated on Geltrex-coated dishes at  $10\text{-}20 \times 10^3$  cells/cm<sup>2</sup> in  
150 mTeSR1 medium + 10 uM Y27632 ROCK inhibitor (Tocris). After 2-4 days, the  
151 cells formed a meshwork of dense ridges with mostly open spaces in between.  
152 The differentiation process was begun (day 0) by feeding the cells every other  
153 day for 12 days with NIM neural induction medium (Stem Cell Technologies),  
154 followed by DDM medium supplemented with 2% B27 (Gaspard et al., 2009)  
155 every other day for 12 days. On day 24, the dense ridges or islands containing  
156 neural progenitors were manually dissociated, resuspended in DDM + 2% B27 +  
157 10 uM Y27632, and plated on dishes and chamber slides coated with poly-

Gonzales et al.

"Transcriptome analysis in trisomy 21"

158 ornithine and laminin (Shi et al., 2012). Every 4-5 days, half the medium was  
159 changed to fresh Neurobasal + 2% B27 + 2mM GlutaMax (Invitrogen). Colonies  
160 that were clearly nonneuronal were removed by scraping, rinsing and refeeding  
161 the cultures. After 40 days of differentiation, the cells were rinsed with PBS and  
162 harvested with ice-cold Trizol or fixed with 4% para-formaldehyde + 4% sucrose  
163 in PBS.

164

165 Successful differentiation of iPSCs into cortical neuronal cultures was confirmed  
166 by immunofluorescence staining for markers of cortical layers V (transcription  
167 factor Ctip2, encoded by BCL11B) and VI (transcription factor TBR1), as well as  
168 for glutamatergic markers vGLUT1 (encoded by SLC17A7) and GRIK2 (see  
169 Supplemental Figure 1).

170

171 *Immunofluorescence staining*

172

173 For live cell staining, StemGent antibodies conjugated to Dylight 488: Tra1-60  
174 or Tra1-81, were applied to iPSC cultures for 30-60 min according the  
175 manufacturer's instructions, and the stained colonies were examined with an  
176 Evos FL microscope.

177

178 For staining of fixed cells, cells were grown on chamber slides (LabTek II CC2),  
179 rinsed with Dulbecco's PBS, fixed 15 min in 4% p-formaldehyde/4% sucrose in  
180 PBS, permeabilized 7 min in 0.25% Triton X-100 in PBS, and blocked 1-2 hrs  
181 with 5% sheep or goat serum in PBS. Primary antibodies, applied overnight at



Gonzales et al.

"Transcriptome analysis in trisomy 21"

182 4°C, were from Abcam: Oct4 (ab19857), Tbr1 (ab31940), Ctif2 (ab18465),  
183 GRIK2 (ab53092), vGlut1 (ab72311) and  $\beta$ III-tubulin (ab7751); from Millipore:  
184 MAP2 (polyclonal AB5622), MAP2 (monoclonal MAB3418). The slides were  
185 rinsed (5X PBS), secondary antibodies (Life Technologies) were applied for 2 hrs  
186 at room temperature, rinsed (4X PBS), stained with DAPI (Sigma D9542), and  
187 mounted with ProLong Gold AntiFade (Life Technologies). Images were  
188 captured using an epifluorescence microscope (Zeiss Axioskop) equipped with a  
189 CCD camera and Slidebook image analysis software (3i).

190

191 *Immunoblotting*

192

193 Lysates of disomic and trisomic iPSCs were prepared with RIPA buffer  
194 containing protease and phosphatase inhibitor cocktails (Sigma), and the protein  
195 content of each lysate was determined (Bradford assay). Using BioRad reagents  
196 and equipment, an equal amount of protein from each lysate was denatured by  
197 boiling 5 minutes in 4x Sample Buffer containing DTT; run on a Criterion XT pre-  
198 cast gradient gel (4%-12%) in XT-MOPS running buffer at 150 volts for 1.5-2  
199 hours; and blotted via a Trans-Blot Turbo system for 7 minutes using the Mixed  
200 Molecular Weight protocol (2.5A, up to 25V). The blot was washed in TBS-T,  
201 (tris-buffered saline containing Tween 20), stained with Ponceau S to affirm  
202 protein transfer, washed again and blocked in 5% milk in TBS-T before being  
203 stained sequentially with MAP2 rabbit polyclonal antibody (1:1000, Abcam  
204 ab32454) and goat anti-rabbit HRP (1:1000). The washed blot was then treated  
205 with SuperSignal West Femto Maximum Sensitivity substrate (Life

Gonzales et al.

"Transcriptome analysis in trisomy 21"

206 Technologies), diluted 1:10 in distilled water, for 5 minutes while covered, and  
207 images were taken using a ChemiDoc-it imaging system and VisionWorks LS  
208 software. The blot was stripped and stained for GAPDH (1:2000) as a loading  
209 control. Images were analyzed using Fiji (ImageJ) and Excel; integrated density  
210 of each band was measured and normalized to the GAPDH signal before  
211 comparing the amount of MAP2 in each protein sample.

212

213 *RNA isolation, cDNA library preparation, high-throughput sequencing*

214

215 RNA for poly(A) RNA sequencing libraries was extracted from iPSC and  
216 neuronal cultures via TRIzol extraction. Genomic DNA was removed using  
217 TURBO DNase (Invitrogen). RNA integrity (RIN) was verified on an Agilent 2100  
218 bioanalyzer and only samples with RIN  $\geq 7.0$  were used for sequencing. Single-  
219 end sequencing libraries were prepared by the UCCC Genomics Core (Aurora,  
220 CO) using the TruSeq Stranded mRNA Library Prep Kit (Illumina). Cluster  
221 generation and sequencing were performed on the Illumina HiSeq 2000 platform.  
222 The reads were de-multiplexed and converted to FASTQ format using CASAVA  
223 software from Illumina.

224

225 *Analysis of RNA-seq data*

226

227 Analysis of library complexity and per-base sequence quality (i.e.  $q > 30$ ) was  
228 assessed using FastQC (v0.11.2) software (Andrews, 2010). Low quality bases  
229 ( $q < 10$ ) were trimmed from the 3' end of reads. Adaptor sequences and reads

Gonzales et al.

"Transcriptome analysis in trisomy 21"

230 shorter than 40 nucleotides were removed using Trimmomatic (Bolger, 2014).  
231 Reads were aligned to GRCh37/hg19 using TopHat2 (v2.0.14, --b2-very-  
232 sensitive --keep- --no-coverage-search --library-type fr-firststrand) (Kim et al.,  
233 2013). High quality mapped reads (MAPQ > 10) were filtered with SAMtools  
234 (v0.1.19) (Li et al., 2009). Gene level counts were obtained using the GRCh37  
235 Ensembl annotation with Rsubread (v 1.18.0, strandSpecific = 2,  
236 GTF.featureType = "exon", countMultiMappingReads = FALSE) (Liao, 2013).  
237 Differential expression of genes was determined using DESeq (v1.24.0) software  
238 with the options "per-condition", "maximum", and "local" for dispersion  
239 calculations (Anders, 2010). Significance was assigned to genes with an FDR  
240 less than 10%.

241

242 *Global RNA Editing*

243

244 The bioinformatics scheme was implemented to specifically quantify the amount  
245 of RNA editing that occurs in known RNA editing locations. With this in mind we  
246 used the "Database of RNA Editing" (DARNED) to procure a list of all previously  
247 published RNA editing locations in the human genome (hg19) (Kiran, 2010). Only  
248 Adenosine to Inosine RNA editing sites in exons were used in the analysis.  
249 Reads overlapping DARNED locations were kept if they were uniquely aligned  
250 with a MAPQ greater than 10, and a minimum PHRED score of 30 at the  
251 nucleotide level. An edit ratio was then determined for each location by summing  
252 the total number of edits (A to G changes) divided by the total possible edits  
253 (read depth at edit location). A minimum read depth of 10 was required for the

Gonzales et al.

"Transcriptome analysis in trisomy 21"

254 edit ratio to be determined. The global editing percentage for each sample was  
255 then ascertained by averaging all edit ratios considered.

256

257 *Alternative splicing analysis*

258

259 Splicing analysis was performed using Hartley's QoRTs / JunctionSeq pipeline  
260 (Hartley, 2016). Tophat aligned reads and an Ensembl annotation file (GRCh37)  
261 were used as input to generate gene counts with QoRTs software using the  
262 options "--stranded", "--singleEnded", and "--minMAPQ 50". A flat annotation file  
263 containing known splice junctions was produced in QoRTs using the same  
264 Ensembl annotation above with the "--stranded" option set. The QoRTs  
265 generated files were both used as input into JunctionSeq for differential exon and  
266 splice junction analysis. Exons or splice junctions were considered differentially  
267 expressed in the disomic vs. trisomic comparison if the adjusted P value was less  
268 than 10%.

269

270 *Semi-quantitative PCR*

271

272 To capture the exclusion of APOO exon 4 in trisomic samples we designed  
273 primers bordering exon 3 and 5 (FWD 5' TCTCACAGCTCCGACACTAT 3', REV  
274 5' GAGTCCAATAAGGCCAGCAA 3'). 30ng/ul of cDNA were used as input for  
275 all samples. PCR cycling conditions were set as follows: denaturation for 5 min at  
276 95 °C, followed by 40 cycles of denaturation for 30 s at 94 °C, annealing for 30 s  
277 at 54 °C, and polymerization for 30s at 72 °C, and a final extension for 10 min at

Gonzales et al.

"Transcriptome analysis in trisomy 21"

278 72 °C. APOO exon 4 exclusion was resolved on 2% agarose gel.

279

280 *Expression of repetitive elements*

281

282 RepEnrich software was used to generate a count table containing uniquely  
283 aligned reads assigned to repetitive elements (Criscione et al., 2014). An hg19  
284 repeatmasker file was used to build the repetitive element annotation. Size  
285 factors generated from the DESeq gene expression analysis were used to  
286 normalize the samples. DESeq (v1.24.0) was used to determine differential  
287 expression of repetitive element transcripts. Significance was assigned to genes  
288 with an FDR less than 10%.

289

290 *Cluster analysis of datasets.*

291

292 The full datasets of normalized transcript accumulation values for the iPSC  
293 studies by Weick et al, 2013; Jiang et al, 2013; and LeTourneau et al, 2014 were  
294 downloaded from the Gene Expression Omnibus (GSE48611, GSE47014, and  
295 GSE55504, respectively). Trisomic/disomic ratios were calculated using the  
296 averaged transcript levels for all genes assayed in each study. Ratios were  
297 imported into Cluster 3.0 (de Hoon et al, 2004) for genes identified as  
298 significantly differentially expressed in our study, and present in 6/7 of the studies  
299 being compared. The ratios were log-transformed, and hierarchical clustering  
300 was performed using centroid linkage and centered correlation for the similarity

Gonzales et al.

"Transcriptome analysis in trisomy 21"

301 matrix. The clustering output was visualized using Java TreeView (Saldanha,  
302 2004).

303

304

305

306

307

## 308 **Results**

309

310 *Generation of RNA-seq data.*

311

312 Paired trisomic/disomic iPSCs were obtained from the Russell lab and  
313 maintained in feeder-free media. Cortical neuronal cultures were derived from  
314 the iPSCs following the procedure of Espuny-Camacho et al (2013) with minor  
315 modifications (see Materials and Methods) and harvested after 40 days in  
316 culture. All sequence data was generated from polyA-selected, strand-specific  
317 sequencing libraries by Illumina sequencing (100-115 bp single end reads). The  
318 iPSC data was generated from 3 independent preps of trisomic clone C2 from  
319 the Russell lab, and 3 independent preps of disomic sub-clones derived from the  
320 C2 lineage (two C2-4-4 and one C2-4-3). Our analysis of the transcriptomes of  
321 cortical neurons compared 3 biologically independent sets of differentiated  
322 cortical neurons derived from the trisomic C2 line and from disomic C3 iPSC cells  
323 (C3-D21, which arose spontaneously from trisomic clone C3). Differentially  
324 expressed transcripts were identified using the DESeq algorithm. Principal

Gonzales et al.

"Transcriptome analysis in trisomy 21"

325 component analysis demonstrated that the 12 transcriptome datasets partitioned  
326 as expected (see Figure 1).

327

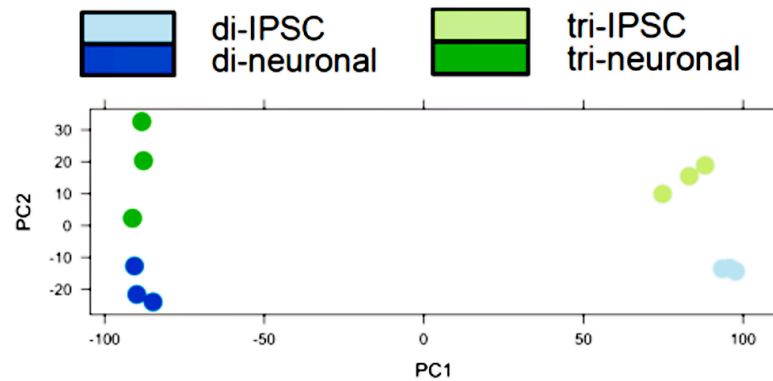

328

**Figure 1. Principal component analysis of transcriptome datasets.** Note principal component 1 clearly segregates iPSC from neuronal cultures, while component 2 partitions trisomic from disomic cells.

329

330 *Gene expression in trisomic cells.*

331

332 Using a false discovery rate (FDR) of 10%, we identified 1644 transcripts (810  
333 up, 834 down) with differential expression between trisomic and disomic iPSCs  
334 (see Supplementary table 1). Gene ontology analysis revealed that trisomic  
335 iPSCs had increased transcript levels for genes involved in neurogenesis and  
336 neuronal function (see Table 1). In contrast, genes with decreased transcripts in  
337 the trisomic iPSCs were heavily over-represented in cell adhesion function and  
338 germ layer/mesoderm development. The germ layer category includes genes  
339 well-established to function in maintenance of stem cell fates (e.g., KLF4,  
340 NODAL, LEFTY1 and 2, etc).

341

**Up in trisomic iPSCs**

| Functional cluster #1                          | Fold Enrichment | PValue     | FDR        |
|------------------------------------------------|-----------------|------------|------------|
| transmission of nerve impulse                  | 3.96            | 8.90E-16   | 1.54E-12   |
| synaptic transmission                          | 3.88            | 6.27E-13   | 1.09E-09   |
| cell-cell signaling                            | 2.84            | 8.56E-13   | 1.49E-09   |
| neurological system process                    | 1.74            | 2.92E-06   | 0.00509259 |
| <b>Functional cluster #2</b>                   |                 |            |            |
| regulation of system process                   | 3.37            | 5.80E-10   | 1.01E-06   |
| regulation of transmission of nerve impulse    | 4.52            | 6.31E-09   | 1.10E-05   |
| regulation of neurological system process      | 4.35            | 1.95E-08   | 2.34E-05   |
| regulation of synaptic transmission            | 4.46            | 4.20E-08   | 7.32E-05   |
| regulation of synaptic plasticity              | 3.61            | 0.00635158 | 10.5118869 |
| <b>Functional cluster #3</b>                   |                 |            |            |
| neuron differentiation                         | 3.17            | 3.89E-12   | 6.77E-09   |
| neuron development                             | 3.15            | 1.93E-09   | 3.37E-06   |
| cell morphogenesis involved in differentiation | 3.55            | 6.04E-09   | 1.05E-05   |
| cell morphogenesis                             | 3.60            | 6.05E-08   | 1.06E-04   |
| neuron projection morphogenesis                | 2.84            | 7.80E-08   | 1.36E-04   |
| cell projection morphogenesis                  | 3.30            | 9.94E-08   | 1.73E-04   |
| cell part morphogenesis                        | 3.16            | 2.47E-07   | 4.31E-04   |
| neuron projection development                  | 3.16            | 2.47E-07   | 4.31E-04   |
| axonogenesis                                   | 3.44            | 8.72E-07   | 0.00152002 |
| cellular component morphogenesis               | 2.55            | 1.02E-06   | 0.0017711  |
| cell projection organization                   | 2.51            | 4.34E-06   | 0.00756051 |
| axon guidance                                  | 3.51            | 3.15E-04   | 0.54781196 |
| cell motion                                    | 1.95            | 5.13E-04   | 0.89116623 |

**Up in trisomic neuronal culture**

| Functional cluster #1                              | Fold Enrichment | PValue     | FDR        |
|----------------------------------------------------|-----------------|------------|------------|
| gamma-aminobutyric acid signaling pathway          | 29.41           | 3.09E-04   | 0.48116101 |
| neurological system process                        | 1.94            | 0.01463154 | 20.5505489 |
| synaptic transmission                              | 3.45            | 0.01518596 | 21.245381  |
| transmission of nerve impulse                      | 2.94            | 0.03052941 | 38.3633337 |
| cell-cell signaling                                | 2.21            | 0.04863405 | 54.0738732 |
| <b>Functional cluster #2</b>                       |                 |            |            |
| cell adhesion                                      | 2.31            | 0.01895984 | 25.8260635 |
| biological adhesion                                | 2.31            | 0.01912934 | 26.0258249 |
| cell-cell adhesion                                 | 2.66            | 0.11533904 | 85.2320977 |
| <b>Functional cluster #3</b>                       |                 |            |            |
| mechanical stimulus involved in sensory perception | 33.93           | 0.00332655 | 5.06765519 |
| detection of mechanical stimulus                   | 27.57           | 0.00505111 | 7.59925072 |

**Down in trisomic iPSCs**

| Functional cluster #1                        | Fold Enrichment | PValue     | FDR        |
|----------------------------------------------|-----------------|------------|------------|
| cell adhesion                                | 2.75            | 2.03E-12   | 3.55E-09   |
| biological adhesion                          | 2.74            | 2.12E-12   | 3.71E-09   |
| homophilic celladhesion                      | 5.38            | 6.15E-10   | 1.08E-06   |
| cell-cell adhesion                           | 3.14            | 5.10E-07   | 8.92E-04   |
| <b>Functional cluster #2</b>                 |                 |            |            |
| gastrulation                                 | 6.87            | 2.54E-08   | 4.44E-05   |
| formation of primary germ layer              | 8.82            | 2.81E-07   | 4.92E-04   |
| embryonic morphogenesis                      | 3.03            | 3.60E-07   | 6.29E-04   |
| pattern specification process                | 3.12            | 9.48E-07   | 0.00165705 |
| mesoderm morphogenesis                       | 8.44            | 1.84E-06   | 0.00321333 |
| mesoderm development                         | 5.63            | 2.70E-06   | 0.0047194  |
| mesoderm formation                           | 8.01            | 1.16E-05   | 0.02024587 |
| anterior/posterior pattern formation         | 3.66            | 3.04E-05   | 0.05307399 |
| regionalization                              | 3.09            | 4.39E-05   | 0.07681769 |
| tissue morphogenesis                         | 3.03            | 1.60E-04   | 0.27891177 |
| tube morphogenesis                           | 3.03            | 0.00203497 | 3.49910234 |
| embryonic development ending in birth or egg | 1.92            | 0.0085742  | 13.9779643 |
| chordate embryonic development               | 1.84            | 0.01582799 | 24.3434896 |
| <b>Functional cluster #3</b>                 |                 |            |            |
| smooth muscle contraction                    | 8.74            | 5.77E-06   | 0.01008282 |
| muscle contraction                           | 3.14            | 3.01E-04   | 0.52510993 |
| muscle system process                        | 2.86            | 7.74E-04   | 1.3448919  |

**Down in trisomic neuronal culture**

| Functional cluster #1                | Fold Enrichment | PValue   | FDR        |
|--------------------------------------|-----------------|----------|------------|
| cell adhesion                        | 2.56            | 6.45E-18 | 1.17E-14   |
| biological adhesion                  | 2.56            | 7.10E-18 | 1.29E-14   |
| cell-cell adhesion                   | 2.34            | 5.88E-06 | 0.01065966 |
| <b>Functional cluster #2</b>         |                 |          |            |
| blood vessel development             | 3.24            | 2.11E-11 | 3.82E-08   |
| vasculature development              | 3.17            | 4.71E-11 | 8.53E-08   |
| angiogenesis                         | 4.00            | 5.25E-11 | 9.52E-08   |
| blood vessel morphogenesis           | 3.24            | 6.71E-10 | 1.22E-06   |
| <b>Functional cluster #3</b>         |                 |          |            |
| extracellular matrix organization    | 4.44            | 1.01E-09 | 1.82E-06   |
| collagen fibril organization         | 7.65            | 1.50E-07 | 2.72E-04   |
| extracellular structure organization | 3.06            | 6.24E-07 | 0.00113042 |

342

343

**Table 1.** Gene ontology enrichment using DAVID (<https://david.ncifcrf.gov/>).

344

345

To confirm the surprising observation that the trisomic iPSCs appeared to

346

express neuronal transcripts at higher levels than the paired disomic iPSCs, we

347

focused on MAP2, a classic microtubule-specific microtubule-binding protein whose

348

transcript was increased an average of 6 fold in the trisomic iPSCs compared to

349

the disomic iPSCs. As shown in Figure 2, MAP2 protein was also significantly

350

increased in the trisomic iPSCs as assayed by either immunoblot or

351

immunofluorescence.



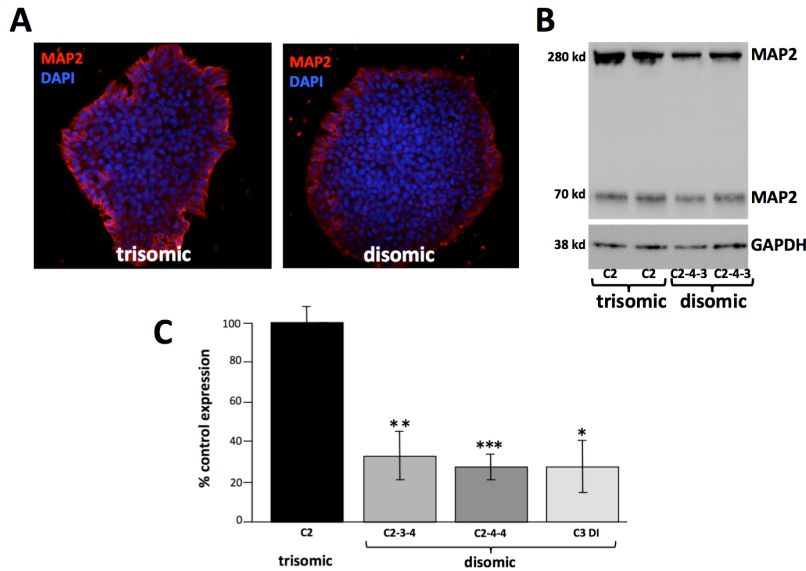

**Figure 2. Trisomic iPSCs show higher levels of MAP2 expression.** **A.** iPSC colonies fixed and stained for MAP2. **B.** Representative immunoblot from trisomic and disomic iPSCs. Note two MAP2 isoforms are detected. **C.** Quantitation of MAP2 immunoblots. (\* =  $P < 0.02$ , \*\* =  $P < 0.01$ , \*\*\*,  $P < 0.001$ , paired T-tests)

352

353

354 Letourneau et al (2014) claimed to identify gene expression dysregulation  
355 domains (GEDDs) in trisomic iPSCs and fibroblasts. We applied the same  
356 algorithmic approach to our iPSC data, and either did not see the same patterns  
357 of expression domains (see Supplemental Figure 2) or did not detect statistically  
358 significant expression domains.

359

360 Using the same parameters applied in the iPSC comparison to the RNA-seq  
361 data from the neuronal cultures, we identified 1,377 transcripts (212 up in  
362 trisomic cells, 1165 down) differentially expressed in the trisomic and disomic  
363 neuronal cultures (See Supplementary Table 2). Gene ontology analysis of  
364 differentially expressed transcripts (Table 1) identified similar functional  
365 categories as observed in the precursor iPSCs. Transcripts for many GABA and  
366 glutamate receptors were markedly increased in the trisomic neuronal cultures.  
367 We note that transcripts for general neuronal markers (e.g., MAP2,  $\beta$ III tubulin,  
368 and SNAP25) were not increased in the trisomic neuronal cultures compared to

Gonzales et al.

"Transcriptome analysis in trisomy 21"

369 the disomic neuronal cultures, suggesting that the increases in synaptic markers  
370 in the trisomic neuronal cultures were not simply the result of a greater proportion  
371 of neurons in these cultures, but rather reflect functional differences in the  
372 neurons themselves. This observation seems to differ from the results of Weick  
373 et al (2013), who observed reduced synaptic activity in their trisomic iPSC-  
374 derived neuronal cultures. As observed for the iPSCs, many categories of cell  
375 adhesion molecules showed decreased transcript accumulation in the trisomic  
376 neuronal cultures. (One class of cell adhesion-associated transcripts was  
377 increased in the trisomic neuronal cultures, however, this class encodes  
378 predominantly neuronal-specific adhesion molecules such as *DAB1*, *CDH18*, and  
379 *NELL2*.) As expected, stem cell-associated transcripts were expressed at low  
380 levels in both the trisomic and disomic neuronal cultures, with no significant  
381 differential expression.

382

383 In both the iPSC and neuronal trisomic cultures, chromosome 21 transcripts  
384 were increased overall, at close to the 1.5 fold increase predicted from a simple  
385 gene dosage effect, however, the specific chromosome 21 genes over-  
386 expressed was dependent on the cell types being analyzed (Figure 3)

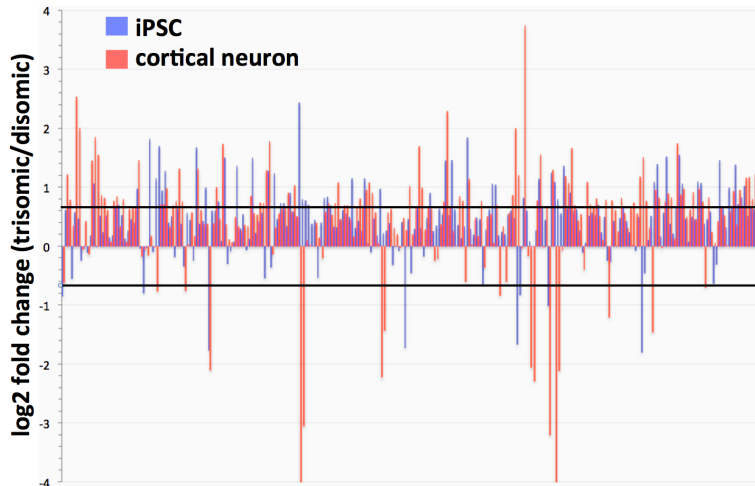

**Figure 3. Expression of Chr 21 genes in iPSCs and cortical neuronal cultures (trisomic/disomic ratios).** Lines represent individual gene ratios across chromosome 21. Note strong general trend for Chr 21 genes to be over-expressed, although specific genes may be strongly up- or down-regulated depending on cell type. (Black lines indicate 1.5 fold increases or decreases in trisomic cells.)

387

388 *Adenosine-to-inosine (A-to-I) editing in trisomic cells.*

389

390 ADARB1 encodes one of the two enzymes responsible for post-transcriptional  
391 A-to-I editing of RNA. This gene is encoded on chromosome 21, leading to  
392 suggestions that excessive RNA editing may occur in trisomy 21 cells. To test  
393 this hypothesis, we scored editing levels at ~10,000 residues annotated to  
394 undergo A-to-I editing (the DARNED database) in the trisomic and disomic  
395 neuronal cultures. (We did not score editing in the iPSCs, as A-to-I editing  
396 happens preferentially in neuronal cells, and in fact the iPSCs had very low levels  
397 of ADARB1 transcripts.) We found that ADARB1 transcripts are increased in the  
398 trisomic neuronal cultures, however levels of these transcripts do not correlate  
399 well with over all levels of A-to-I editing (see Figure 4). We conclude that  
400 increased levels of ADARB1 transcripts do not lead to increases in global RNA  
401 editing. Our dataset does not have sufficient read depth to determine rigorously  
402 if there were significant changes in site-specific editing in the trisomic neuronal  
403 cultures.

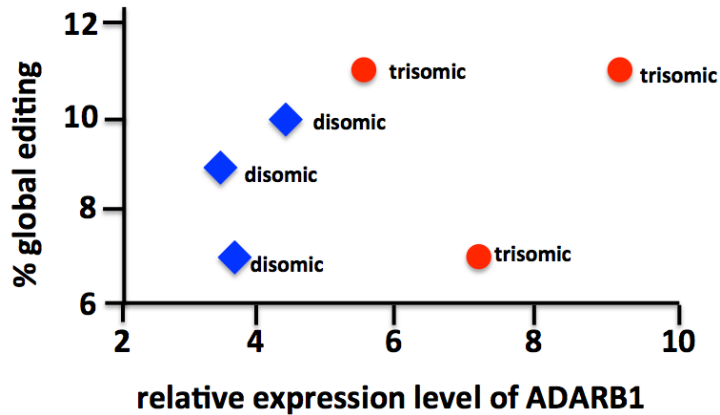

**Figure 4. Correlation between ADARB1 transcript abundance and levels of global A-to-I editing.** Note that all trisomic cultures had higher normalized levels of ADARB1 transcripts, but this did not necessarily translate into higher editing rates.

404

405 *Splicing alterations in trisomic cells.*

406

407 To identify differences in splicing between trisomic and disomic cells, we tested  
408 multiple splicing algorithms, and chose JunctionSeq (see Methods). Using this  
409 algorithm we identified 117 annotated genes with splicing changes when  
410 comparing trisomic and disomic iPSCs, and 36 such genes when comparing the  
411 derived cortical neuron cultures (using a conservative adjusted P value < 0.01).  
412 (See Supplemental Table 3.) Only one gene, SLC38A2, appeared to have  
413 altered splicing in both the iPSCs and cortical neuronal cultures, perhaps not  
414 surprising given the large transcriptional and splicing differences between stem  
415 cells and neurons. To verify this bioinformatic analysis, we performed semi-  
416 quantitative RT-PCR on a subset of genes identified in the iPSC analysis.  
417 Shown in Figure 5 are the results for the Apolipoprotein O gene (APOO). As  
418 predicted by the JunctionSeq analysis, trisomic cells show increased exclusion of  
419 exon 14.

420

Gonzales et al.

"Transcriptome analysis in trisomy 21"

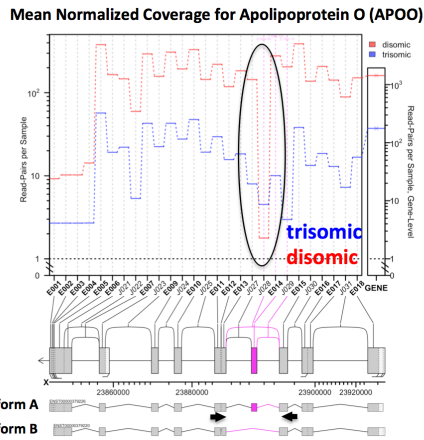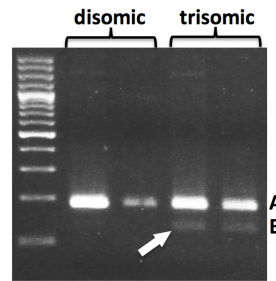

**Figure 5. Altered splicing pattern of APOO in trisomic cells.**

**A.** JunctionSeq output supporting the skipping of exon 14 in trisomic iPSCs. **B.** RT-PCR targeting exon 14 exclusion (primer locations shown by arrows in panel A). Arrow indicates exon exclusion band only recovered in trisomic cells.

421

422

423 *Accumulation of repetitive element transcripts in trisomic cells.*

424

425 Retrotransposons, one class of repetitive elements, appear to play an important  
426 role in the maintenance of stem cell pluripotency (Macfarlan et al, 2012; Fort et  
427 al, 2014). To determine whether chromosome 21 trisomy might impact the  
428 accumulation of repetitive element (RE) transcripts globally, we used the  
429 RepEnrich algorithm (Criscione et al, 2014) to compare RE transcript levels in  
430 both the iPSC and differentiated neuronal trisomic/disomic culture pairs (see  
431 Supplemental table 4). In the iPSC comparison, there was a trend towards  
432 decreased RE transcript accumulation in the trisomic cells, with 26/38  
433 differentially expressed RE transcripts (FDR <10%) lower in the trisomic cells.  
434 Interestingly, the most highly expressed RE transcript in the iPSCs was HERVH-  
435 int, which also showed the most (statistically) significant difference between the  
436 trisomic and disomic iPSCs: a > 3 fold reduction in the trisomic cells. There was  
437 no significant difference in HERVH-int expression in cortical neuronal cultures,  
438 and the overall trend in RE expression appeared reversed, with 18/21  
439 significantly different RE transcripts increased in the trisomic cells.

Gonzales et al.

"Transcriptome analysis in trisomy 21"

440

441 *Comparison to other transcriptome data sets.*

442

443 The iPSCs and induced neuronal cultures that we have characterized were  
444 derived from a single individual, thereby intrinsically limiting the generalization of  
445 our results. However, three datasets have been published that have attempted a  
446 similar transcriptome characterization using trisomic/disomic iPSC pairs that  
447 have the same genetic background within each study (Table 2). Weick et al  
448 (2013) derived iPSCs from fibroblasts from a DS individual who was mosaic for  
449 chromosome 21 trisomy, which allowed the derivation of both trisomic and  
450 disomic iPSCs. Jiang et al (2013) used an elegant, inducible XIST-based system  
451 to inhibit expression of one chromosome 21 in trisomic iPSC clones, which also  
452 allowed a trisomic/disomic comparison in the same iPSC clone. Letourneau et al  
453 (2014) identified a rare set of monozygotic twins discordant for chromosome 21  
454 trisomy, and that enabled them to derive a trisomic/disomic iPSC pair. As we  
455 have done, these studies all used statistical criteria to generate lists of genes  
456 with differential expression in trisomic vs. disomic iPSCs. Comparison of these  
457 lists identified no differentially expressed gene common to all the studies, except  
458 for genes expressed on chromosome 21. There are multiple, non-mutually  
459 exclusive, possible explanations for this observation: inherent variability in  
460 independently-generated iPSCs, large effects of the experimental conditions  
461 used in individual labs, insufficient replication to identify all transcriptome  
462 differences accurately, strong effects of genetic background, one or more study  
463 with outlying data, or a fundamental absence of a non-chromosome 21

Gonzales et al.

"Transcriptome analysis in trisomy 21"

464 transcriptome signature in trisomic iPSCs. To sort through these possibilities, we  
465 undertook a cluster analysis to determine how the datasets grouped. In  
466 particular, we sought to determine if our dataset was truly an outlier in  
467 comparison to the previous studies.

| <u>study</u>                          | <u>isogenic iPSC approach</u>             | <u>sex</u> | <u>transforming factors</u> | <u>culture</u> | <u>transcriptome analysis</u> |
|---------------------------------------|-------------------------------------------|------------|-----------------------------|----------------|-------------------------------|
| Li et al, 2012<br>(used in our study) | genetic selection for Chr 21 loss         | M          | LIN28, NANOG, SOX2, OCT4    | feeder-free    | RNA-seq                       |
| Weick et al, 2013                     | fibroblasts from mosaic individual        | M          | OCT4, SOX2, KLF4, MYC       | MEFs           | microarray                    |
| Jiang et al, 2013                     | inducible XIST inactivation of one Chr 21 | M          | OCT4, SOX2, KLF4, MYC       | MEFs           | microarray                    |
| Letourneau et al, 2014                | fibroblasts from discordant twin pair     | F          | OCT4, SOX2, KLF4, MYC       | human foreskin | RNA-seq                       |

468

469 **Table 2. Comparable studies assaying transcriptome differences in isogenic**

470 **disomic/trisomic iPSCs pairs.**

471

472 The relevant data from previous studies were downloaded from online  
473 repositories, and trisomic/disomic ratios were calculated for all the annotated  
474 genes assayed. This approach enabled us to use a dimensionless measure that  
475 allowed comparison of RNA-seq and microarray data. Our study and the twin  
476 study by Letourneau et al (2014) produced single sets of trisomic/disomic ratios.  
477 The study by Weick et al (2013) generated two sets of ratios, using the data from  
478 two trisomic clones (DS1 and DS4) and one disomic clone (DS2). (We  
479 calculated the DS1/DS2 and DS4/DS2 ratios to maximize information, while  
480 appreciating that these ratios are not independent because they use the same  
481 denominator.) The study by Jiang et al (2013) examined 3 independent XIST  
482 chromosome 21 insertion subclones derived from the same parental trisomic  
483 iPSC clone. These subclones were subjected to doxycycline-induced XIST

Gonzales et al.

"Transcriptome analysis in trisomy 21"

484 silencing, and trisomic/disomic ratios could be calculated by comparing  
485 uninduced/induced transcriptome measurements, thus generating 3 independent  
486 ratios (clones 1, 2, 3). The cluster analysis was based on the trisomic/disomic  
487 ratios of our set of differentially expressed genes and the calculated ratios for the  
488 same genes in the other datasets. After filtering for genes with values in at least  
489 5/6 of the other datasets, 942 genes were used for the clustering analysis (see  
490 Materials and Methods).

491

492 Figure 6A shows the dendrogram of the calculated dataset relationships. Note  
493 that our dataset does not appear to be an outlier, but instead clusters with clone  
494 3 of the study by Jiang et al (2013) and with the twin study of Letourneau et al.  
495 (2014). Figure 6B shows a portion of the gene expression heat map for the  
496 clustered datasets, capturing genes that had increased expression (red color) in  
497 our dataset (second column in heat map display). Note that these genes include  
498 neuron-associated transcripts such as neurexin (NRXN1), neurocan (NCAN),  
499 and  $\alpha$ -2A adrenoreceptor (ADRA2A), all of which also show increased  
500 expression in the trisomic iPSCs characterized in the twin study of Letourneau et  
501 al (2014; first column in heat map display).



Gonzales et al.

"Transcriptome analysis in trisomy 21"

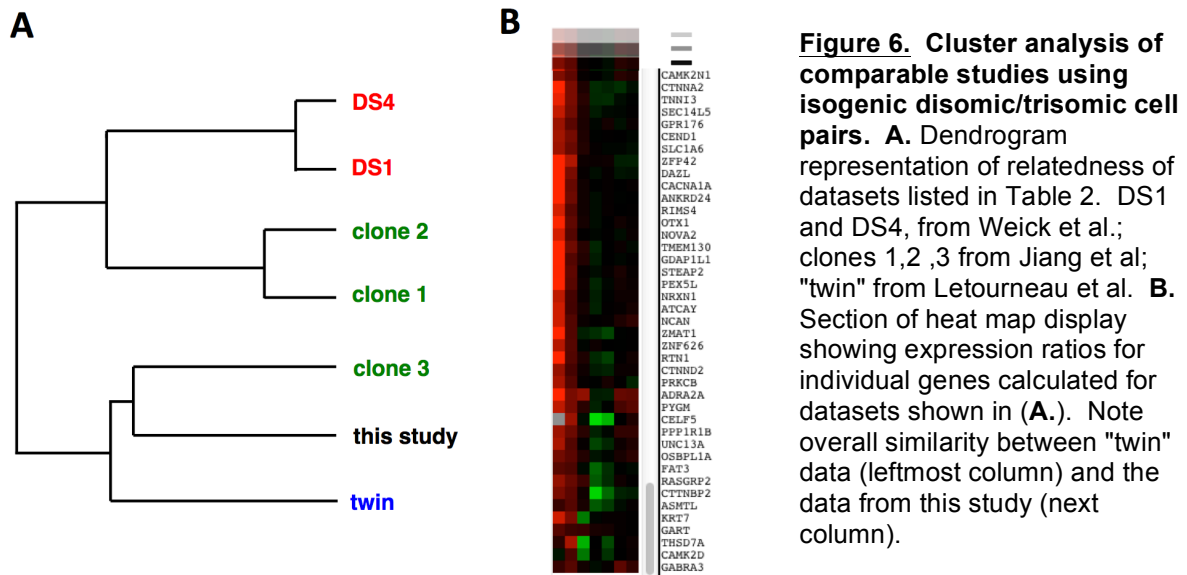

502

503 **Discussion.**

504

505 *Transcript accumulation differences between cells trisomic or disomic for*

506 *chromosome 21.*

507

508 An inherent limitation of human transcriptome studies is accounting for the

509 differing genetic background of individuals. In the context of Down syndrome,

510 this limitation has hindered determining the degree to which trisomy of

511 chromosome 21 alters expression of genes on this chromosome and in the

512 genome as a whole. However, recent technical advances have allowed the

513 derivation of iPSCs trisomic or disomic for chromosome 21 from the same

514 individual. We have used RNA-seq to characterize in depth the transcriptome of

515 one such trisomic/disomic iPSC pair, originally generated by Li and colleagues

516 (Li et al, 2012). We have also differentiated these iPSCs into cortical neuronal

517 cultures to investigate how trisomy of chromosome 21 impacts the transcriptome

518 in differentiated neurons. Our results indicate that an increase in chromosome

Gonzales et al.

"Transcriptome analysis in trisomy 21"

519 21 dosage does generally lead to increased transcript accumulation for  
520 chromosome 21 genes. However, not all chromosome 21 genes follow this  
521 pattern, and which genes show increased expression depends on the cell type  
522 assayed (iPSCs vs. differentiated cortical neurons). This observation may not be  
523 surprising, given how regulatory loops, compensatory changes, and cell-specific  
524 transcriptional programs may modulate or override the dosage effect on any  
525 given chromosome 21 gene. In this regard, it has recently been reported  
526 (Sullivan et al, 2016) that the interferon response is up-regulated in trisomy 21  
527 fibroblasts and lymphoblast lines, likely due to increased expression in these  
528 cells of the four interferon receptors (IFNAR1, IFNAR2, IFNGR2, and IL10RB)  
529 located on chromosome 21. We find that these receptors also have increased  
530 transcript accumulation in the trisomic iPSCs we analyzed, but this is not  
531 apparent in the derived neuronal cultures.

532

533 As observed in other studies, the majority of significant transcriptome changes  
534 we identified in both iPSCs and derived neuronal cultures occur in non-  
535 chromosome 21 genes. Gene ontology analysis of genes with transcript  
536 abundance changes in trisomic iPSCs unexpectedly revealed increases in  
537 transcripts from neuronal-associated genes and decreases in transcripts from  
538 genes involved in cell adhesion function and germ layer/mesoderm development.  
539 These differences did not result from visible spontaneous differentiation in the  
540 trisomic iPSCs, which were monitored daily. We note, however, that cells in  
541 iPSC cultures are not homogeneous (see Figure 2), and one interpretation of our

Gonzales et al.

"Transcriptome analysis in trisomy 21"

542 results is that the trisomic iPSC cultures contain higher proportions of stem cells  
543 biased towards neuronal development.

544

545 One significant consideration in comparing the trisomic and disomic iPSCs used  
546 in this study is that the disomic clones have gone through two cycles of selection:  
547 first with G418 to select for the insertion of a dual selection cassette into exon 3  
548 of the *APP* gene, and then with gancyclovir to select for loss of the chromosome  
549 21 bearing the inserted selection cassette. It is possible that these rounds of  
550 selection resulted in epigenetic (or, less likely, genetic) changes that added to the  
551 transcriptional differences between the trisomic and disomic iPSCs. In fact, we  
552 were unable to efficiently differentiate into cortical neuronal cultures any of the 4  
553 disomic clones that had gone through these selection procedures. As the  
554 differentiation protocol we used has been employed by other research groups to  
555 produce cortical neuron cultures from iPSCs with normal karyotypes, we suspect  
556 that the derivation of disomic clones may have resulted in a subtle intrinsic  
557 change in the iPSC state. Fortunately, we were able to derive a spontaneous  
558 disomic line from the C3 trisomic iPSC clone, which did readily differentiate into  
559 cortical neurons. The C3 disomic iPSCs (C3-D21) were therefore used to  
560 generate the disomic cortical neuronal cultures. Importantly, C3-D21 disomic  
561 iPSCs expressed less MAP2 than trisomic iPSCs (Figure 3C), and we still  
562 observed increased expression of neuronal-associated genes in the C2 trisomic  
563 neuronal cultures compared to the disomic neuronal cultures derived from C3-  
564 D21. These observations argue that our finding that C2 trisomic cells have a

Gonzales et al.

"Transcriptome analysis in trisomy 21"

565 more neuronal character than disomic cells from the same individual cannot be  
566 attributed to an artifact of the genetically-selected disomic clones.

567

568 The neuronal differentiation protocol we used (Espuny-Camacho et al, 2013)  
569 has been reported to result in the production of layer V and VI cortical neurons  
570 after 40 days in culture, which we confirmed by immunofluorescence microscopy  
571 using antibodies against layer V and VI - specific transcription factors CTIP2 and  
572 TBR1, as well as antibodies to glutamate receptor GRIK2 and glutamate  
573 transporter vGLUT1 (Supplementary Figure 1). While the neuronal cultures  
574 derived from the trisomic and disomic iPSCs were not readily distinguishable  
575 using any of these markers, there were significant transcriptome differences. Of  
576 particular note was increased transcript accumulation for synaptic proteins,  
577 including GABA (GABRG2, GABRA1, GABRB2, GABBR2) and glutamate  
578 (GRIN2B, GRIA1) receptors in the trisomic iPSC-derived neuronal cultures. We  
579 note that increased GABAergic signaling occurs in the Ts65Dn mouse DS  
580 model (Kleschevnikov et al, 2012a), and counteracting GABAergic inhibition in  
581 these mice reverses behavioral deficits (Kleschevnikov et al, 2012b).

582

583 *Transcriptome characteristics not affected by chromosome 21 trisomy.*

584

585 The increased chromosome 21 gene dosage in trisomic cells could conceivably  
586 affect global RNA metabolism, as chromosome 21 encodes the RNA editing  
587 gene ADARB1 and multiple splicing factors (including U2AF1, SON and SCAF4).  
588 Global chromatin effects of chromosome 21 trisomy were also proposed by

Gonzales et al.

"Transcriptome analysis in trisomy 21"

589 Letourneau et al (2014), who identified gene expression dysregulation domains  
590 (GEDDs) in trisomic iPSCs and fibroblasts. We have analyzed our transcriptome  
591 data for trisomy-dependent changes in adenosine-to-inosine RNA editing,  
592 alternative splicing, repetitive element expression, and chromosomal domains of  
593 altered expression. Examining more than 10,000 annotated RNA editing sites  
594 (from the DARNED database), we did not find any evidence for global changes in  
595 RNA editing in trisomic iPSC-derived neuronal cultures. This analysis does not  
596 preclude changes in site-specific editing, which would require significantly deeper  
597 sequencing depth to assay accurately. Nevertheless, our data indicate that  
598 global editing levels do not correlate with ADARB1 transcript levels, likely due to  
599 the multiple factors that control the accumulation of edited transcripts. Our data  
600 also did not reproduce the gene expression domains identified by Letourneau et  
601 al (2014), and we note that an independent analysis of the Letourneau data has  
602 questioned the existence of GEDDs (Do et al., 2015).

603

604 *Altered splicing in trisomic cells.*

605

606 We did observe trisomy-dependent splicing changes in both the iPSCs and  
607 neuronal cultures. Our identification of splicing alterations in trisomic cells is not  
608 completely novel, as splicing differences in a selected set of genes has been  
609 observed in fetal DS tissue (Toiber et al, 2010). RNA-seq has also been used  
610 previously to support altered splicing in DS endothelial progenitor cells, although  
611 no confirmatory studies were done (Costa et al, 2011). The large majority of  
612 splicing changes we identified did not occur in genes located on chromosome 21,

Gonzales et al.

"Transcriptome analysis in trisomy 21"

613 suggesting that they were not a direct effect of gene dosage (i.e., higher gene  
614 dosage leading to competition for splicing factors and subsequent altered  
615 splicing). More likely is the possibility that altered expression or altered activity of  
616 splicing factors caused the splicing dysregulation observed in trisomic cells. We  
617 did observe increased transcript accumulation for three known or suspected  
618 splicing factors (U2AF1, SON, and SCAF4) located on chromosome 21 in the  
619 trisomic iPSC and/or neuronal cultures. Alternatively, increased expression of  
620 chromosome 21 gene DYRK1A, a kinase known to regulate splicing factors  
621 (Qian 2011), could contribute to the splicing changes we identified. Over-  
622 expression of DYRK1A in mice has been reported to mimic Down syndrome  
623 splicing aberrations (Tobier et al, 2010). Direct demonstration of a role of  
624 DYRK1A or specific splicing factors in the trisomy-dependent splicing changes  
625 we have observed will require additional studies in which the gene dosage or  
626 expression levels of these genes are normalized in trisomic backgrounds.

627

628 *Altered HERVH expression in trisomic iPSCs.*

629

630 Examination of the accumulation of repetitive element transcripts revealed a  
631 highly significant decrease in transcripts from the endogenous retrovirus HERVH  
632 in the trisomic iPSCs. HERVH transcripts have been specifically identified as a  
633 pluripotency marker (Santoni et al, 2012), and disruption of HERVH transcription  
634 compromises self-renewal in human embryonic stem cells (Wang et al, 2014).  
635 The reduced HERVH expression we observe in trisomic iPSCs is consistent with

Gonzales et al.

"Transcriptome analysis in trisomy 21"

636 these cells having an altered pluripotent state in comparison to the disomic

637 iPSCs.

638

639 *Comparison with other datasets.*

640

641 As described above, consideration of the possible effects of the selection

642 procedures used to generate the disomic derivative clones suggests a possible

643 technical reason why we have observed transcriptional differences not reported

644 by other investigators. However, cluster analysis of our dataset with other

645 comparable studies suggests that our results are not anomalous, but may reflect

646 the range of states assumed by human stem cells trisomic for chromosome 21.

647 The dendrogram shown in figure 6A could be interpreted as showing that there

648 are two classes of trisomic stem cells: one class with a more neuronal character

649 (cells from this study, the twin study of Letourneau et al, and clone 3 from the

650 Jiang study), and one class with a more mesodermal character (clones 1 and 2

651 from the Jiang study, and both trisomic lines from the Wieck et al study). This is

652 likely an oversimplification; more extensive data might readily reveal a spectrum

653 of trisomic stem cell fates. However, this analysis does suggest that there is

654 unlikely to be a single transcriptome signature for trisomic stem cells, and the

655 observed transcriptome variation may not simply be a result of varying

656 experimental conditions. This latter point is supported by the observation that

657 clone 3 of the Jiang et al study clustered more closely with our data set than with

658 the other XIST clones. The Jiang study was particularly well controlled, as the

659 iPSCs were grown under the same conditions (using mouse embryonic

Gonzales et al.

"Transcriptome analysis in trisomy 21"

660 fibroblasts as feeder cells) with the same length of XIST-based knockdown of  
661 chromosome 21 expression (3 weeks). Nevertheless, clone 3 trisomic iPSCs  
662 appeared more similar to ours, which were grown in feeder-free media.

663

664 *Chromosome 21 trisomy and stem cell pluripotency.*

665

666 Why might trisomic iPSCs show a range of transcriptome signatures? Given  
667 our observation that the trisomic iPSCs we characterized had enhanced  
668 accumulation of transcripts associated with differentiated neurons, and reduced  
669 expression of the HERVH pluripotency marker, we speculate that trisomic iPSCs  
670 may have an inherent inability to maintain a full pluripotent state. Following this  
671 assumption, trisomic iPSCs would have a more constrained differentiation  
672 capacity than corresponding disomic iPSCs, which could explain their reported  
673 defects in neuronal differentiation (Jiang et al, 2013). On the other hand, in the  
674 absence of full pluripotency, trisomic iPSCs might alternatively be biased towards  
675 ectodermal fates (e.g., the trisomic iPSCs we have characterized). The specific  
676 developmental bias of a given trisomic iPSC might depend on a variety of factors:  
677 genetic background, initial culture conditions, pluripotency factor expression, or  
678 stochastic variation. If the gene dosage burden imposed by chromosome 21  
679 trisomy generally interferes with the maintenance of stem cell fate, this might  
680 account for some Down syndrome clinical phenotypes, including the  
681 hematopoietic developmental defects observed in DS (Roberts and Izraeli,  
682 2014). In this regard, it has been reported that the Ts65Dn mice have defects in  
683 the self-renewal of hematopoietic stem cells as well as in the expansion of



Gonzales et al.

"Transcriptome analysis in trisomy 21"

684 mammary epithelial cells, neural progenitors and fibroblasts, specifically due to  
685 the triplication of Usp16 (Adorno et al, 2013).

686

687 **Literature cited**

688

689 1. M. Adorno *et al.*, Usp16 contributes to somatic stem-cell defects in Down's  
690 syndrome. *Nature* **501**, 380-384 (2013).

691 2. S. Anders, W. Huber, Differential expression analysis for sequence count  
692 data. *Genome Biol* **11**, R106 (2010).

693 3. Andrews S. FastQC: a quality control tool for high throughput sequence  
694 data. (2010). Available online at:

695 <http://www.bioinformatics.babraham.ac.uk/projects/fastqc>

696 4. A. M. Bolger, M. Lohse, B. Usadel, Trimmomatic: a flexible trimmer for  
697 Illumina sequence data. *Bioinformatics* **30**, 2114-2120 (2014).

698 5. V. Costa *et al.*, Massive-scale RNA-Seq analysis of non ribosomal  
699 transcriptome in human trisomy 21. *PLoS One* **6**, e18493 (2011).

700 6. S. W. Criscione, Y. Zhang, W. Thompson, J. M. Sedivy, N. Neretti,  
701 Transcriptional landscape of repetitive elements in normal and cancer  
702 human cells. *BMC Genomics* **15**, 583 (2014).

703 7. M. J. de Hoon, S. Imoto, J. Nolan, S. Miyano, Open source clustering  
704 software. *Bioinformatics* **20**, 1453-1454 (2004).

705 8. I. Espuny-Camacho *et al.*, Pyramidal neurons derived from human  
706 pluripotent stem cells integrate efficiently into mouse brain circuits in vivo.  
707 *Neuron* **77**, 440-456 (2013).

708 9. A. Fort *et al.*, Deep transcriptome profiling of mammalian stem cells  
709 supports a regulatory role for retrotransposons in pluripotency

- 710 maintenance. *Nat Genet* **46**, 558-566 (2014).
- 711 10. K. Gardiner *et al.*, Down syndrome: from understanding the neurobiology  
712 to therapy. *J Neurosci* **30**, 14943-14945 (2010).
- 713 11. N. Gaspard, A. Gaillard, P. Vanderhaeghen, Making cortex in a dish: in  
714 vitro corticogenesis from embryonic stem cells. *Cell Cycle* **8**, 2491-2496  
715 (2009).
- 716 12. F. Guedj *et al.*, The fetal brain transcriptome and neonatal behavioral  
717 phenotype in the Ts1Cje mouse model of Down syndrome. *Am J Med*  
718 *Genet A* **167A**, 1993-2008 (2015).
- 719 13. S. W. Hartley, J. C. Mullikin, QoRTs: a comprehensive toolset for quality  
720 control and data processing of RNA-Seq experiments. *BMC Bioinformatics*  
721 **16**, 224 (2015).
- 722 14. S. W. Hartley, J. C. Mullikin, Detection and visualization of differential  
723 splicing in RNA-Seq data with JunctionSeq. *Nucleic Acids Res* **44**, e127  
724 (2016).
- 725 15. J. Jiang *et al.*, Translating dosage compensation to trisomy 21. *Nature*  
726 **500**, 296-300 (2013).
- 727 16. D. Kim *et al.*, TopHat2: accurate alignment of transcriptomes in the  
728 presence of insertions, deletions and gene fusions. *Genome Biol* **14**, R36  
729 (2013).
- 730 17. A. Kiran, P. V. Baranov, DARNED: a DAtabase of RNa EDiting in humans.  
731 *Bioinformatics* **26**, 1772-1776 (2010).
- 732 18. A. M. Kleschevnikov *et al.*, Deficits in cognition and synaptic plasticity in a

- 733 mouse model of Down syndrome ameliorated by GABAB receptor  
734 antagonists. *J Neurosci* **32**, 9217-9227 (2012).
- 735 19. A. M. Kleschevnikov *et al.*, Increased efficiency of the GABAA and  
736 GABAB receptor-mediated neurotransmission in the Ts65Dn mouse  
737 model of Down syndrome. *Neurobiol Dis* **45**, 683-691 (2012).
- 738 20. A. Letourneau *et al.*, Domains of genome-wide gene expression  
739 dysregulation in Down's syndrome. *Nature* **508**, 345-350 (2014).
- 740 21. H. Li *et al.*, The Sequence Alignment/Map format and SAMtools.  
741 *Bioinformatics* **25**, 2078-2079 (2009).
- 742 22. L. B. Li *et al.*, Trisomy correction in Down syndrome induced pluripotent  
743 stem cells. *Cell Stem Cell* **11**, 615-619 (2012).
- 744 23. Y. Liao, G. K. Smyth, W. Shi, The Subread aligner: fast, accurate and  
745 scalable read mapping by seed-and-vote. *Nucleic Acids Res* **41**, e108  
746 (2013).
- 747 24. K. H. Ling *et al.*, Functional transcriptome analysis of the postnatal brain of  
748 the Ts1Cje mouse model for Down syndrome reveals global disruption of  
749 interferon-related molecular networks. *BMC Genomics* **15**, 624 (2014).
- 750 25. B. Liu, S. Filippi, A. Roy, I. Roberts, Stem and progenitor cell dysfunction  
751 in human trisomies. *EMBO Rep* **16**, 44-62 (2015).
- 752 26. C. Liu *et al.*, Mouse models for Down syndrome-associated developmental  
753 cognitive disabilities. *Dev Neurosci* **33**, 404-413 (2011).
- 754 27. T. S. Macfarlan *et al.*, Embryonic stem cell potency fluctuates with  
755 endogenous retrovirus activity. *Nature* **487**, 57-63 (2012).

- 756 28. J. L. Olmos-Serrano *et al.*, Down Syndrome Developmental Brain  
757 Transcriptome Reveals Defective Oligodendrocyte Differentiation and  
758 Myelination. *Neuron* **89**, 1208-1222 (2016).
- 759 29. M. C. Potier *et al.*, Transcriptional disruptions in Down syndrome: a case  
760 study in the Ts1Cje mouse cerebellum during post-natal development. *J*  
761 *Neurochem* **97 Suppl 1**, 104-109 (2006).
- 762 30. W. Qian *et al.*, Regulation of the alternative splicing of tau exon 10 by  
763 SC35 and Dyrk1A. *Nucleic Acids Res* **39**, 6161-6171 (2011).
- 764 31. I. Roberts, S. Izraeli, Haematopoietic development and leukaemia in Down  
765 syndrome. *Br J Haematol* **167**, 587-599 (2014).
- 766 32. A. J. Saldanha, Java Treeview--extensible visualization of microarray data.  
767 *Bioinformatics* **20**, 3246-3248 (2004).
- 768 33. F. A. Santoni, J. Guerra, J. Luban, HERV-H RNA is abundant in human  
769 embryonic stem cells and a precise marker for pluripotency. *Retrovirology*  
770 **9**, 111 (2012).
- 771 34. N. G. Saran, M. T. Pletcher, J. E. Natale, Y. Cheng, R. H. Reeves, Global  
772 disruption of the cerebellar transcriptome in a Down syndrome mouse  
773 model. *Hum Mol Genet* **12**, 2013-2019 (2003).
- 774 35. Y. Shi, P. Kirwan, J. Smith, H. P. Robinson, F. J. Livesey, Human cerebral  
775 cortex development from pluripotent stem cells to functional excitatory  
776 synapses. *Nat Neurosci* **15**, 477-486, S471 (2012).
- 777 36. K. D. Sullivan *et al.*, Trisomy 21 consistently activates the interferon  
778 response. *Elife* **5**, (2016).

Gonzales et al.

"Transcriptome analysis in trisomy 21"

- 779 37. D. Toiber *et al.*, Engineering DYRK1A overdosage yields Down syndrome-  
780 characteristic cortical splicing aberrations. *Neurobiol Dis* **40**, 348-359  
781 (2010).
- 782 38. J. Wang *et al.*, Primate-specific endogenous retrovirus-driven transcription  
783 defines naive-like stem cells. *Nature* **516**, 405-409 (2014).
- 784 39. J. P. Weick *et al.*, Deficits in human trisomy 21 iPSCs and neurons. *Proc*  
785 *Natl Acad Sci U S A* **110**, 9962-9967 (2013).
- 786

787 **Supplemental Figures**

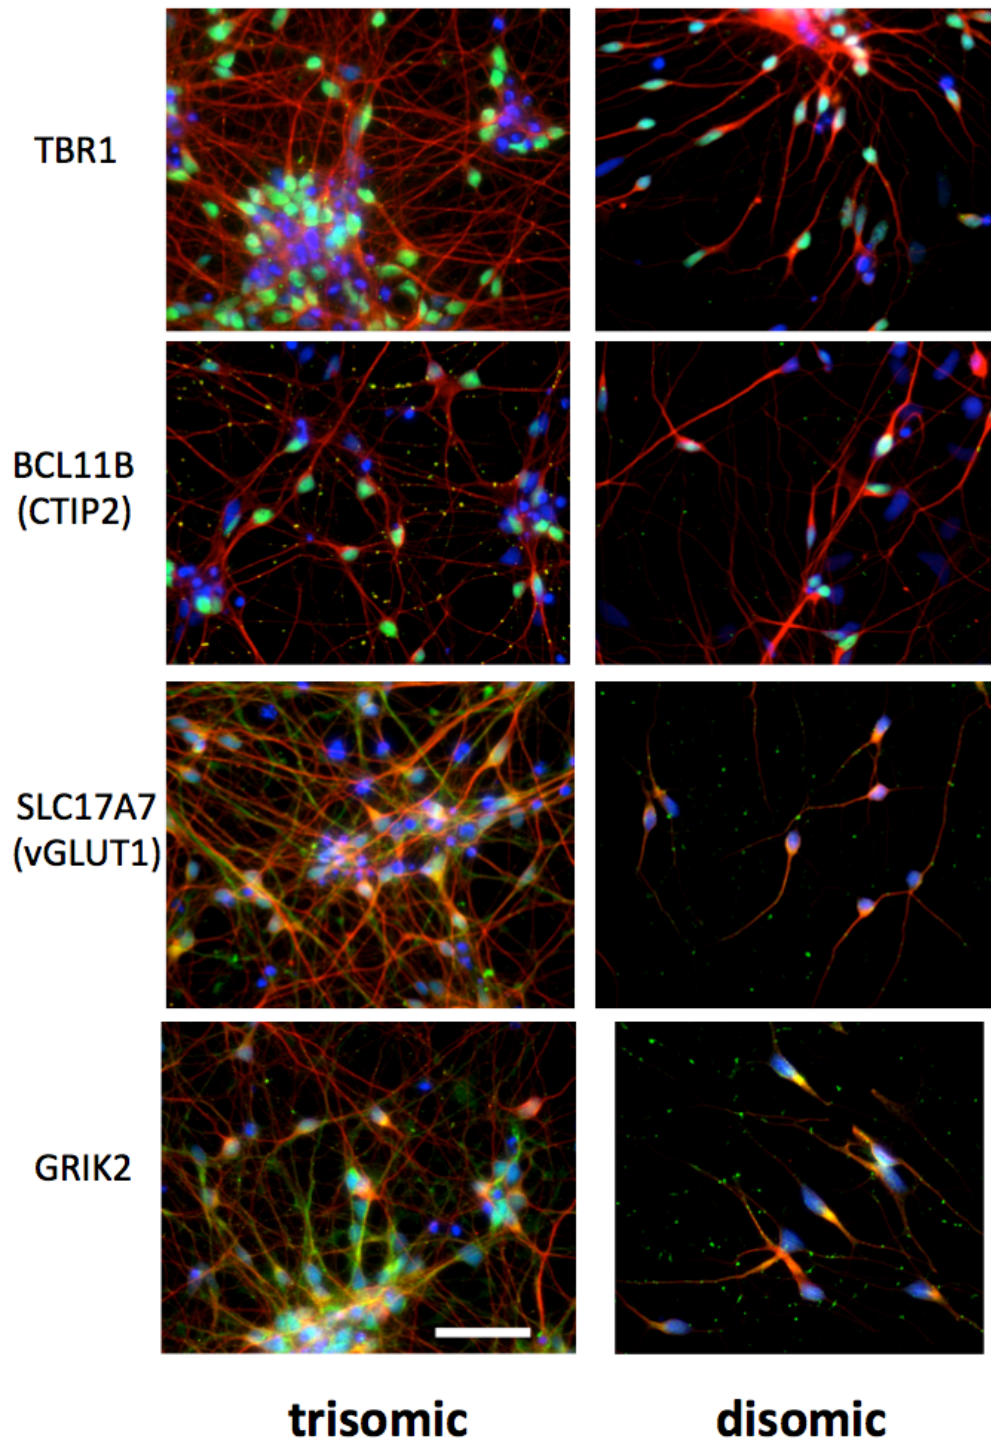

788

789 **Supplemental Figure 1.** Confirmation of differentiation of iPSCs into cortical

790 neuronal cultures. Images taken from clones C2 (trisomic) and C3 -D21

791 (disomic) 40 days after initiation of the differentiation protocol. Fixed cells on

Gonzales et al.

"Transcriptome analysis in trisomy 21"

792 chamber slides were probed with antibodies against the marker proteins listed in  
793 the left column. Neuronal marker Beta III tubulin is red; DAPI is blue; and CtIp2,  
794 TBR1, SLC17A7 (vGLUT1) and GRIK2 are green. Size bar = 20 microns.

795

796

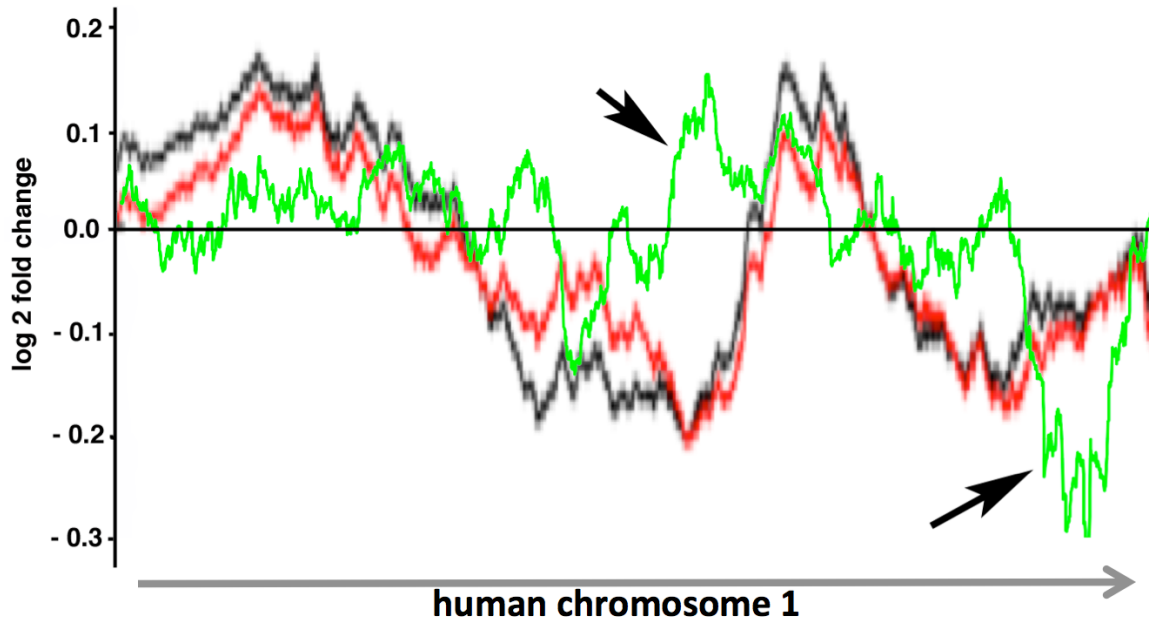

797

798

799 **Supplementary Figure 2.** Comparison of putative trisomy-dependent gene  
800 expression domains identified on chromosome 1 by Letourneau et al (2014) and  
801 this study. Lines show regions of increased or decreased gene expression in  
802 cells trisomic for chromosome 21 as calculated using the smoothing algorithm  
803 employed by Letourneau et al. The red (iPSCs) and black (fibroblast) traces are  
804 taken from the Letourneau study; the green trace is from the iPSCs used in this  
805 study. Note that there are significantly different expression domains calculated  
806 from the different studies (arrows).

807



Gonzales et al.

"Transcriptome analysis in trisomy 21"

808

809
